# Supplementary material
Source: PubMed Central journal article supplement (PMC4817544)
Supplement: NIHMS771578-supplement-Supp1.pdf [file NIHMS771578-supplement-Supp1.pdf]

# Organohalogen contaminants and vitamins in Northern Fur Seals (*Callorhinus ursinus*) collected during subsistent hunts in Alaska

Jessica L. Reiner<sup>1\*</sup>, Paul R. Becker<sup>1</sup>, Matthew O. Gribble<sup>2</sup>, Jennifer M. Lynch<sup>1</sup>, Amanda J. Moors<sup>1</sup>, Jennifer Ness<sup>1</sup>, Danielle Peterson<sup>1</sup>, Rebecca S. Pugh<sup>1</sup>, Tamika Ragland<sup>3</sup>, Catherine Rimmer<sup>2</sup>, Jody Rhoderick<sup>1</sup>, Michele M. Schantz<sup>4</sup>, Jennifer Trevillian<sup>1</sup>, John R. Kucklick<sup>1</sup>

Number of pages: 5

Number of tables: 2

Number of figures: 2

Table S1. Sample information, collection date, rookery, and total extractable organic content.

Table S2. Range of PFAAs concentrations in northern fur seal liver samples.

Figure S1. Percent makeup of PCB homolog group in northern fur seal samples.

Figure S2. Percent makeup of PFAAs in northern fur seal samples.

## Statistical Methods

The software package Stata/SE 11.2 was used for analysis. Parametric quantile regression models based on the generalized gamma distribution are versatile tools for analyzing right-skewed continuous data. For this study, we used generalized gamma regression models without any predictors to determine an appropriate and more parsimonious distribution for each biomarker outcome: all biomarkers except tocopherols were consistent with a lognormal distribution, while tocopherols were consistent with a Weibull distribution. We then switched to parametric quantile regression models assuming lognormal or Weibull distributions, as appropriate, to estimate the relative medians of the biomarkers as a flexible function of years elapsed since 1987. We ran models with polynomial terms for year ranging from 0-order polynomials (e.g. constant relationship with respect to time), up to 5th-order polynomials, and selected the best model by likelihood ratio tests for nested models, using  $\alpha=0.05$  as the decision-rule for significantly improved model fit. To examine potential over-fitting of the data, the candidate “best” model of the relationship of biomarker medians with time was contrasted with a model with only a linear term for time by comparing the mean root mean squared error for each model across a 5-fold cross-validation; this led to a selection of model with a linear term for time for chlordanes rather than the cubic model suggested by likelihood ratio tests; all other exposures’ model selections were unchanged. We accounted for the clustering of seals within rookeries by robust clustered sandwich standard errors that were applied after the models were fit by maximum likelihood estimation.

Table S1. Sample information, collection date, rookery, and total extractable organic content.

| <b>Fur Seal<br/>Sample #</b> | <b>Blubber<br/>Storage #</b> | <b>Liver<br/>Storage #</b> | <b>Collection<br/>Date</b> | <b>Rookery</b> | <b>Total Extractable<br/>Organics (%)</b> |
|------------------------------|------------------------------|----------------------------|----------------------------|----------------|-------------------------------------------|
| 1                            | MM1B004                      | MM1L001                    | 7/28/1987                  | Polavina       | 51.2                                      |
| 2                            | MM1B008                      | MM1L005                    | 7/28/1987                  | Polavina       | 73.0                                      |
| 3                            | MM1B012                      | MM1L009                    | 7/28/1987                  | Polavina       | 70.8                                      |
| 4                            | MM1B016                      | MM1L013                    | 7/29/1987                  | Northeast      | 69.6                                      |
| 5                            | MM1B020                      | MM1L017 <sup>a</sup>       | 7/29/1987                  | Northeast      | 80.7                                      |
| 6                            | MM4B097                      | MM4L095                    | 7/23/1990                  | Zapadni        | 62.5                                      |
| 7                            | MM4B100                      | MM4L098                    | 7/23/1990                  | Zapadni        | 69.5                                      |
| 8                            | MM4B103                      | MM4L101                    | 7/23/1990                  | Zapadni        | 63.2                                      |
| 9                            | MM4B106                      | MM4L104                    | 7/23/1990                  | Zapadni        | 72.4                                      |
| 10                           | MM4B109                      | MM4L107                    | 7/24/1990                  | Reef           | 50.6                                      |
| 11                           | MM4B112                      | MM4L110                    | 7/24/1990                  | Reef           | 45.1                                      |
| 12                           | MM4B115                      | MM4L113                    | 7/24/1990                  | Reef           | 57.8                                      |
| 13                           | MM4B118                      | MM4L116                    | 7/27/1990                  | Reef           | 76.4                                      |
| 14                           | MM4B121                      | MM4L119                    | 7/24/1990                  | Reef           | 66.2                                      |
| 15                           | MM4B124                      | MM4L122                    | 7/24/1990                  | Reef           | 42.9                                      |
| 16                           | MM12B648                     | MM12L646                   | 8/6/1997                   | Zapadni        | 67.0                                      |
| 17                           | MM12B652                     | MM12L650                   | 8/6/1997                   | Zapadni        | 57.0                                      |
| 18                           | MM12B656                     | MM12L654                   | 8/6/1997                   | Zapadni        | 65.5                                      |
| 19                           | MM12B660                     | MM12L658                   | 8/6/1997                   | Zapadni        | 57.0                                      |
| 20                           | MM12B664                     | MM12L662                   | 8/6/1997                   | Zapadni        | 65.0                                      |
| 22                           | MM16B169C                    | MM16L167C                  | 7/10/2000                  | Polavina       | 62.5                                      |
| 23                           | MM16B172C                    | MM16L170C                  | 7/10/2000                  | Polavina       | 78.6                                      |
| 24                           | MM16B175C                    | MM16L173C                  | 7/10/2000                  | Polavina       | 71.0                                      |
| 25                           | MM16B178C                    | MM16L176C                  | 7/10/2000                  | Polavina       | 60.4                                      |
| 26                           | MM16B181C                    | MM16L179C                  | 7/10/2000                  | Polavina       | 79.9                                      |
| 27                           | MM16B184C                    | MM16L182C                  | 7/10/2000                  | Polavina       | 68.5                                      |
| 28                           | MM16B187C                    | MM16L185C                  | 7/10/2000                  | Polavina       | 76.8                                      |
| 29                           | MM16B190C                    | MM16L188C                  | 7/10/2000                  | Polavina       | 69.7                                      |
| 30                           | MM16B193C                    | MM16L191C                  | 7/10/2000                  | Polavina       | 68.8                                      |
| 31                           | MM16B196C                    | MM16L194C                  | 7/10/2000                  | Polavina       | 74.8                                      |
| 38                           | MM22B819C                    | MM22L818C                  | 7/22/2006                  | Reef           | 75.8                                      |
| 39                           | MM22B822C                    | MM22L820C                  | 7/22/2006                  | Reef           | 75.4                                      |
| 40                           | MM22B825C                    | MM22L823C                  | 7/22/2006                  | Reef           | 65.3                                      |
| 41                           | MM22B828C                    | MM22L826C                  | 7/22/2006                  | Reef           | 81.9                                      |
| 42                           | MM22B831C                    | MM22L829C                  | 7/22/2006                  | Reef           | 70.4                                      |
| 44                           | MM22B796C                    | MM22L794C                  | 7/22/2006                  | Reef           | 82.2                                      |
| 45                           | MM22B799C                    | MM22L797C                  | 7/22/2006                  | Reef           | 84.3                                      |
| 46                           | MM22B808C                    | MM22L806C                  | 7/22/2006                  | Reef           | 70.7                                      |
| 47                           | MM22B802C                    | MM22L800C                  | 7/22/2006                  | Reef           | 77.5                                      |
| 48                           | MM22B836C                    | MM22L834C                  | 7/22/2006                  | Reef           | 83.6                                      |
| 52                           | MM22B899C                    | MM22L897C                  | 7/8/2007                   | Polavina       | 74.2                                      |
| 53                           | MM22B902C                    | MM22L900C                  | 7/8/2007                   | Polavina       | 77.9                                      |
| 54                           | MM22B905C                    | MM22L903C                  | 7/8/2007                   | Polavina       | 63.7                                      |
| 55                           | MM22B908C                    | MM22L906C                  | 7/8/2007                   | Polavina       | 56.1                                      |
| 56                           | MM22B911C                    | MM22L909C                  | 7/8/2007                   | Polavina       | 68.1                                      |
| 57                           | MM22B914C                    | MM22L912C                  | 7/8/2007                   | Polavina       | 76.5                                      |
| 58                           | MM22B917C                    | MM22L915C                  | 7/8/2007                   | Polavina       | 68.3                                      |
| 59                           | MM22B920C                    | MM22L918C                  | 7/8/2007                   | Polavina       | 64.1                                      |
| 60                           | MM22B923C                    | MM22L921C                  | 7/8/2007                   | Polavina       | 70.3                                      |
| 61                           | MM22B926C                    | MM22L924C                  | 7/8/2007                   | Polavina       | 65.4                                      |

<sup>a</sup>MM1L017 sample was never located and excluded from the analysis

Table S2. Range of PFAAs concentrations (ng/g wet mass) in northern fur seal liver samples.

|        | <b>Polavina</b><br>(n=23) | <b>Northeast</b><br>(n=1) | <b>Zapadni</b><br>(n=9) | <b>Reef</b><br>(n=16) |
|--------|---------------------------|---------------------------|-------------------------|-----------------------|
|        | Range                     | Range                     | Range                   | Range                 |
| PFNA   | <0.682-19.8               | 2.39                      | 1.17-8.55               | 0.555-13.1            |
| PFDA   | <0.884-1.70               | <0.400                    | <0.592-1.42             | <0.374                |
| PFUnA  | 1.50-122                  | 17.8                      | 1.69-12.2               | 0.545-138             |
| PFDoA  | <0.370-2.21               | <0.201                    | <0.248-2.78             | <0.229                |
| PFTriA | <0.222-13.8               | 1.84                      | 0.823-4.69              | <0.222-25.9           |
| PFTA   | <0.174-0.973              | <0.342                    | <0.174-1.32             | <0.314                |
| PFHxS  | <0.122-1.63               | 0.135                     | 0.111-0.358             | <0.122-0.460          |
| PFOS   | 0.927-15.8                | 4.92                      | 3.09-13.6               | 1.09-17.5             |
| PFOSA  | <0.162-3.99               | <0.162                    | <0.259-3.19             | <0.151-1.39           |

Values shown as “<” a specified number describe the actual reporting limit (RL)

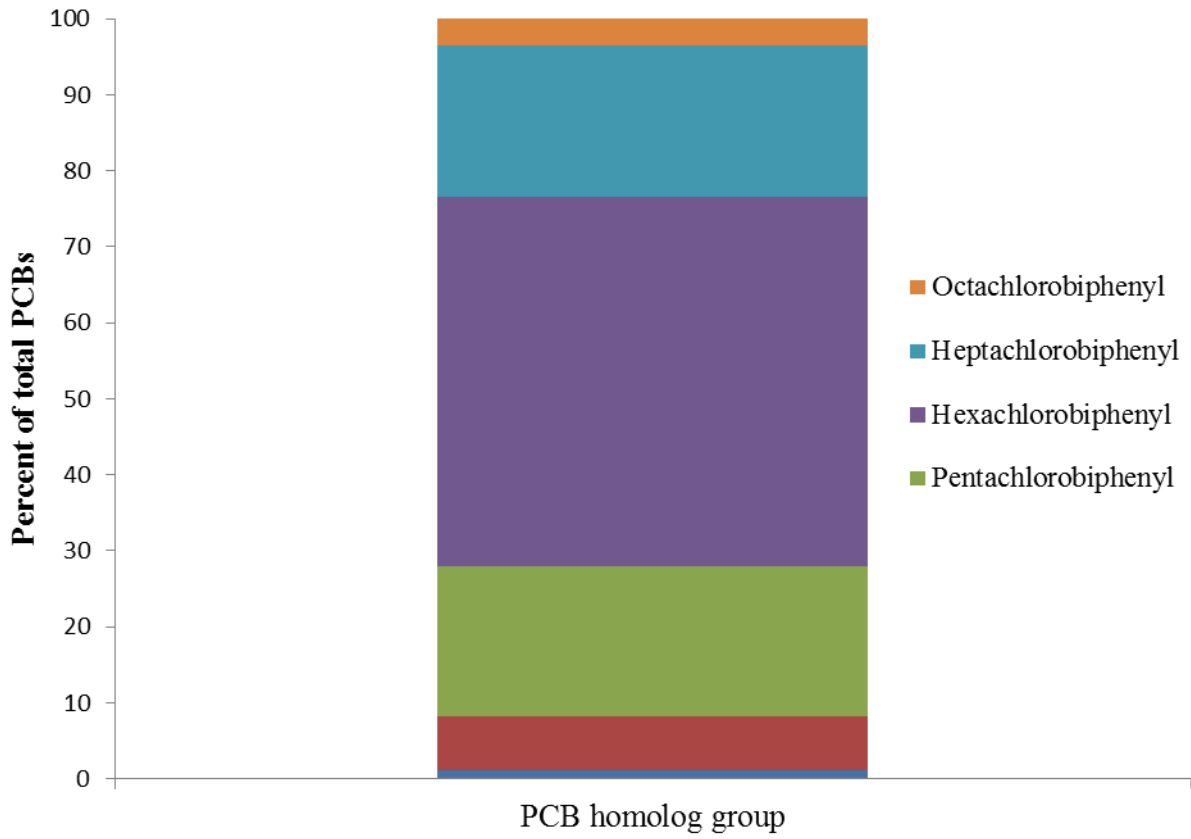

Figure S1. Percent makeup of PCB homolog group in northern fur seal samples.

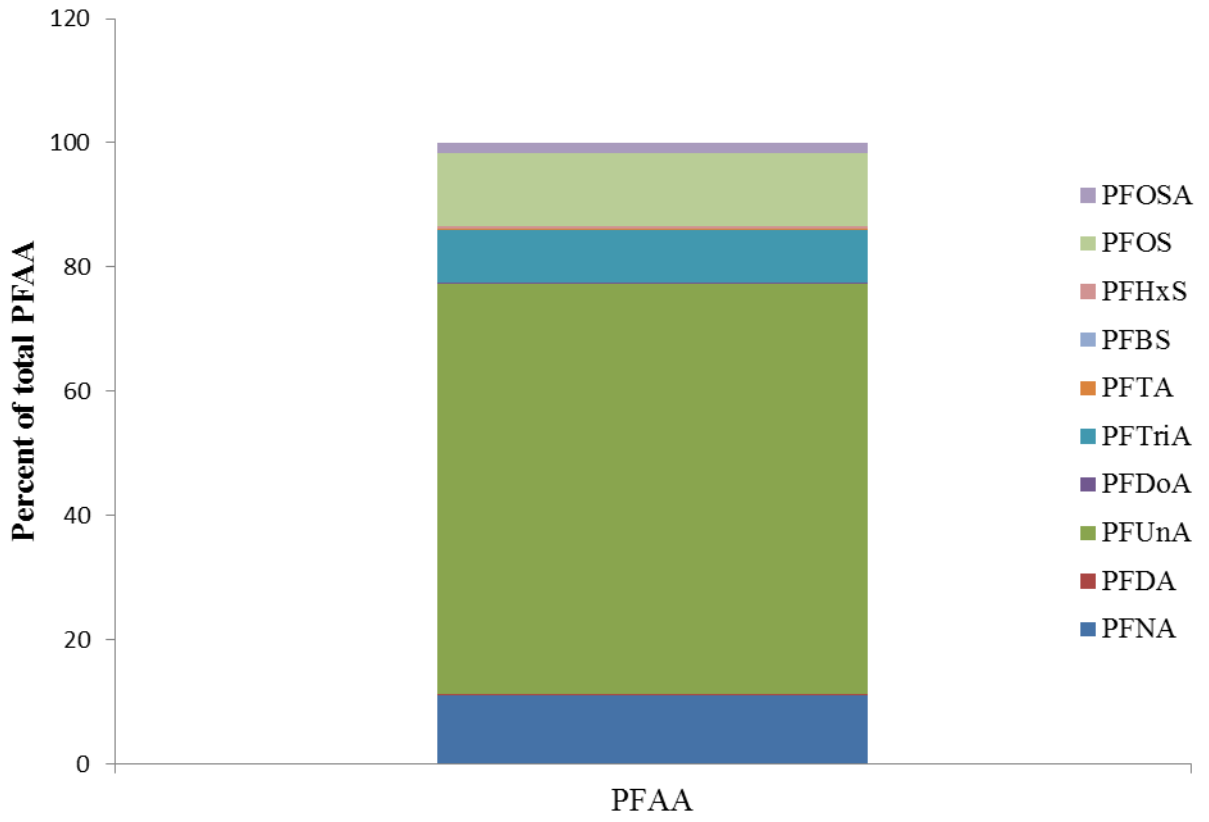

Figure S2. Percent makeup of PFAAs in northern fur seal samples.
